# Supplementary material for: MycoResistance: a curated resource of drug resistance molecules in Mycobacteria
Source: PubMed Central journal article supplement (PMC6619405; doi:10.1093/database/baz074), 2019-07-10
Supplement: supplementary_file_baz074.pdf [file supplementary_file_baz074.pdf]

# **MycoResistance: A Curated Resource of Drug Resistance Molecules in *Mycobacteria***

Enyu Dai<sup>1</sup>, Hao Zhang<sup>1</sup>, Xu Zhou<sup>2</sup>, Qian Song<sup>2</sup>, Di Li<sup>1</sup>, Lei Luo<sup>1</sup>, Xinyu Xu<sup>1</sup>, Wei Jiang<sup>2,\*</sup> and Hong Ling<sup>1,\*</sup>

<sup>1</sup> Department of Microbiology; Wu Lien-Teh Institute; Department of Parasitology, Harbin Medical University, Harbin, China; Heilongjiang Provincial Key Laboratory of Infection and Immunity, Harbin, China; Key Laboratory of Pathogen Biology, Harbin 150081, P. R. China;

<sup>2</sup> Department of Biomedical Engineering, College of Automation Engineering, Nanjing University of Aeronautics and Astronautics, Nanjing 211106, P.R. China;

## **Contents**

**Supplementary Figure S1.** Summary of keywords and literatures that were used in MycoResistance database.

**Supplementary Figure S2.** The architecture and interface of MycoResistance database.

**Supplementary Figure S1. Summary of keywords and literatures that were used in MycoResistance database.**

|           |                   | Keyword 2       |                     |                  |               |       |
|-----------|-------------------|-----------------|---------------------|------------------|---------------|-------|
|           |                   | Drug Resistance | Drug Susceptibility | Drug Sensitivity | Drug Response |       |
| Keyword 1 | Gene              | 2,466           | 604                 | 2,466            | 604           | 3,705 |
|           | Mutation          | 2,080           | 176                 | 1,113            | 176           |       |
|           | Genome Variation  | 113             | 23                  | 39               | 12            |       |
|           | Coding Region     | 60              | 22                  | 26               | 14            |       |
|           | Non-coding Region | 4               | 1                   | 1                | 0             |       |
|           | Intergenic Region | 62              | 25                  | 43               | 7             |       |
|           | Non-coding RNA    | 20              | 4                   | 12               | 17            |       |
|           | Small RNA         | 31              | 7                   | 18               | 7             |       |
|           |                   | Mycobacteria    |                     |                  |               |       |
|           |                   | Keyword 3       |                     |                  |               |       |

**Supplementary Figure S2. The architecture and interface of MycoResistance database.** (A) The architecture of MycoResistance. B) The interface of MycoResistance, including ‘Search’, ‘Browse’ and ‘Download’ pages.

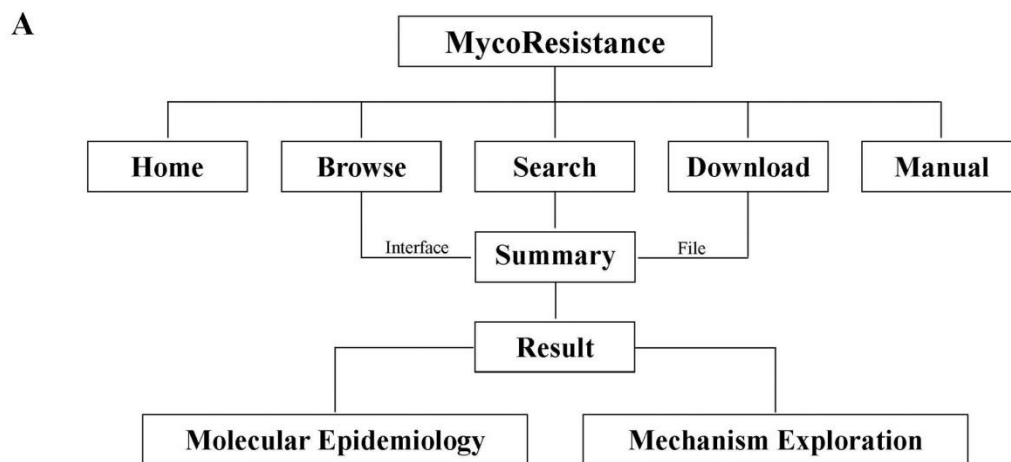

**B**

**Search Form**

Species: All Species Note: 6 kinds of species were included in the database.

Compound: All Compounds Note: 73 compounds were included in the database.

Molecule: All Molecules Example: rpoB, katG or rrs

Research Category: All Research

---

**Compound List**

Show 10 entries

| Compound      | Formula      | Weight        | Grade       | Route     | Molecule             |
|---------------|--------------|---------------|-------------|-----------|----------------------|
| Ethionamide   | CSH10N2S     | 166.24 g/mol  | Second Line | Oral      | <a href="#">More</a> |
| Ciprofloxacin | C17H18FN3O3  | 331.34 g/mol  | Second Line | Oral      | <a href="#">More</a> |
| Ampicillin    | C16H19N3O4S  | 349.405 g/mol | Second Line | Injection | <a href="#">More</a> |
| Levofloxacin  | C18H20FN3O4  | 361.36 g/mol  | Second Line | Oral      | <a href="#">More</a> |
| Ofloxacin     | C18H20FN3O4  | 361.36 g/mol  | Second Line | Oral      | <a href="#">More</a> |
| Gatifloxacin  | C19H22FN3O4  | 375.39 g/mol  | Second Line | Oral      | <a href="#">More</a> |
| Moxifloxacin  | C21H24FN3O4  | 401.43 g/mol  | Second Line | Oral      | <a href="#">More</a> |
| Clofazimine   | C27H22Cl2N4  | 473.39 g/mol  | Second Line | Oral      | <a href="#">More</a> |
| Kanamycin     | C18H36N4O11  | 484.49 g/mol  | Second Line | Injection | <a href="#">More</a> |
| Bedaquiline   | C32H31BrN2O2 | 555.516 g/mol | Second Line | Oral      | <a href="#">More</a> |

Showing 61 to 70 of 73 entries

---

**Download Form**

Release 1 (2019-02-18)  
Initial release.

| File                     | Category               | Release    | Download                 |
|--------------------------|------------------------|------------|--------------------------|
| Reference Summary        | All Research           | 2019-02-18 | <a href="#">Download</a> |
| Epidemiology Information | Molecular Epidemiology | 2019-02-18 | <a href="#">Download</a> |
| Molecule Change Summary  | Molecular Epidemiology | 2019-02-18 | <a href="#">Download</a> |
| Mechanism Information    | Mechanism Exploration  | 2019-02-18 | <a href="#">Download</a> |
